# Supplementary material for: Using Graphene-Based Materials for Stiff and Strong Poly(ethylene glycol) Hydrogels
Source: MDPI journal article supplement (doi:10.3390/ijms23042312), 2022-02-19
Supplement: s1 [file s1]

# Using Graphene-Based Materials for Stiff and Strong Poly(Ethylene Glycol) Hydrogels

Helena P. Ferreira <sup>1,2,3</sup>, Duarte Moura <sup>1,2,4</sup>, Andreia T. Pereira <sup>1,2</sup>, Patrícia C. Henriques <sup>1,2</sup>, Cristina C. Barrias <sup>1,2,3</sup>,  
Fernão D. Magalhães <sup>5</sup> and Inês C. Gonçalves <sup>1,2,\*</sup>

<sup>1</sup> i3S—Instituto de Investigação e Inovação em Saúde, Universidade do Porto, Rua Alfredo Allen 208, 4200-135 Porto, Portugal; helen.ferreira@i3s.up.pt (H.P.F.); duarte.moura@i3s.up.pt (D.M.); andrea.pereira@i3s.up.pt (A.T.P.); ap.henriques@ineb.up.pt (P.C.H.); ccbarras@ineb.up.pt (C.C.B.)

<sup>2</sup> INEB—Instituto de Engenharia Biomédica, Universidade do Porto, Rua Alfredo Allen 208, 4200-135 Porto, Portugal

<sup>3</sup> ICBAS—Instituto de Ciências Biomédicas Abel Salazar, Universidade do Porto, Rua Jorge de Viterbo Ferreira 228, 4050-313 Porto, Portugal

<sup>4</sup> FEUP—Faculdade de Engenharia, Departamento de Engenharia Metalúrgica e de Materiais, Universidade do Porto, Rua Dr. Roberto Frias, 4200-465 Porto, Portugal

<sup>5</sup> LEPABE—Laboratório de Engenharia de Processos, Ambiente, Biotecnologia e Energia, Faculdade de Engenharia da Universidade do Porto, Rua Dr. Roberto Frias, 4200-465 Porto, Portugal; fdmagalh@fe.up.pt

\* Correspondence: icaastro@ineb.up.pt

## SUPPLEMENTARY INFORMATION

| Hydrogel            | PEG MW (kDa)  | PEG conc. (%w/v)                               | Crosslinking                                                     | Incorporation of GBM                             | GBM conc. (%w/v)                 | Mechanical tests           | Mechanical properties                                                                                                                                                                                                                                                                                              | Application                                                   | Ref. |
|---------------------|---------------|------------------------------------------------|------------------------------------------------------------------|--------------------------------------------------|----------------------------------|----------------------------|--------------------------------------------------------------------------------------------------------------------------------------------------------------------------------------------------------------------------------------------------------------------------------------------------------------------|---------------------------------------------------------------|------|
| PEGDM               | 0.55          | 70.8                                           | Photocrosslinking<br>UV 365 nm, 15 min                           | rGO<br>Physical                                  | 0.079, 0.31, 0.62,<br>0.78, 0.92 | -                          | -                                                                                                                                                                                                                                                                                                                  | NIR-triggered transdermal insulin delivery                    | [28] |
| PEGDM               | 0.7, 2, 6, 12 | 6, 8, 10, 12<br>(respectively, for each MW)    | Radical crosslinking<br>APS and TEMED<br>RT, 1h                  | GO<br>Physical<br><br>Methacrylic-GO<br>Covalent | 0.025, 0.05, 0.1, 0.2,<br>0.4    | Compressive                | For 0.4% GO composites:<br>0.7kDa: YM= 32kPa, CS= 276kPa<br>2kDa: YM= 40kPa, CS= 1000kPa<br>6kDa: YM= 36kPa, CS= 750kPa<br>12kDa: YM= 24kPa, CS= 975kPa<br>For 0.4% M-GO composites:<br>0.7kDa: YM= 20kPa, CS= 180kPa<br>2kDa: YM= 8kPa, CS= 520kPa<br>6kDa: YM= 12kPa, CS= 650kPa<br>12kDa: YM= 24kPa, CS= 975kPa | Load-bearing biomedical applications                          | [29] |
| PVA/PEG             | 6             | 13.3                                           | Physical crosslinking<br>(with GO)<br>Freeze-thawing, -40 °C, 8h | GO<br>Physical                                   | 0.15, 0.3, 0.6, 1.2              | Tensile                    | Neat hydrogel:<br>TS= 20kPa, EB= 120%<br>Composite hydrogels:<br>0.15% GO: TS=100kPa, EB= 780%<br>0.3% GO: TS= 110kPa; EB= 830%<br>0.6% GO: TS= 120kPa; EB= 860%<br>1.2% GO: TS= 160kPa; EB= 920%                                                                                                                  | Skin-compatible, conductive hydrogel for ECG electrodes       | [30] |
| PEG                 | 1             | 10%                                            | Photocrosslinking<br>Irgacure 2959, UV 365 nm, 150 sec           | G-BSA<br>Physical                                | 0.255, 0.51                      | AFM-enabled nanoidentation | Neat hydrogel:<br>YM= 42.6kPa<br>Composite hydrogels:<br>0.255% GO: YM= 50.1kPa<br>0.51% GO: YM= 284.2kPa                                                                                                                                                                                                          | Load-bearing, conductive biomedical applications              | [31] |
| PEG-melamine/ HA-SH | 0.7           | 5<br>(+ 40% HA)                                | Chemical crosslinking<br>RT, 1 min                               | GO<br>Physical                                   | 0.05                             | Rheological                | Neat hydrogel: G'= 11 Pa<br>Composite hydrogel: G'= 25 Pa                                                                                                                                                                                                                                                          | Injectable, conductive cell-laden hydrogel for cardiac repair | [32] |
| PEDOT:PSS/ PEGDA    | 0.575         | 20, 30, 40, 50<br>(+ 0.2, 0.4, 0.6% PEDOT:PSS) | Photocrosslinking<br>Darocur 1173, UV 365 nm, 5 sec              | rGO<br>Physical                                  | 0.125, 0.25                      | Compressive (DMA)          | Neat PEGDA hydrogel:<br>20% PEG: YM= 550kPa<br>30% PEG: YM= 1400kPa<br>40% PEG: YM= 1500kPa<br>50% PEG: YM= 1800kPa<br>Composite hydrogel:<br>0.125% rGO: YM= 230kPa<br>0.25% rGO: YM= 270kPa                                                                                                                      | Strong, conductive hydrogel for biomedical applications       | [33] |
| GelMA/PEGDA         | 8             | 0, 2.5, 5, 10<br>(+ 5% GelMA)                  | Photocrosslinking<br>Ciba, UV 360 nm, 40 °C                      | GO<br>Physical                                   | 0.02, 0.04, 0.08                 | Compressive                | Neat 5% GelMa/5% PEGDA hydrogels:<br>YM= 64.4kPa<br>Composite hydrogels:<br>0.02% GO: YM= 70kPa<br>0.04% GO: YM= 80kPa<br>0.08% GO: YM= 95.6kPa                                                                                                                                                                    | Load-bearing biomedical applications                          | [34] |

**Table S1 –PEG/GBM composite hydrogels reported in literature.** Summary of formulations and mechanical testing of PEG/GBM composite hydrogels reported in literature. Abbreviations: AFM – atomic force microscopy; APS – ammonium persulfate; BSA – bovine serum albumin; CS – compressive strength; DMA – dynamic mechanical analysis; EB – elongation at break; GelMA – gelatin methacrylate; HA – hyaluronic acid; MW – molecular weight; PEDOT:PSS – poly(3,4-ethylenedioxythiophene) polystyrene sulfonate; PEGDA – PEG diacrylate; PEGDM – PEG dimethacrylate; PVA – poly(vinyl alcohol); TEMED – N,N,N',N'-tetramethylethane-1,2-diamine; TS – tensile strength; YM – Young's modulus.

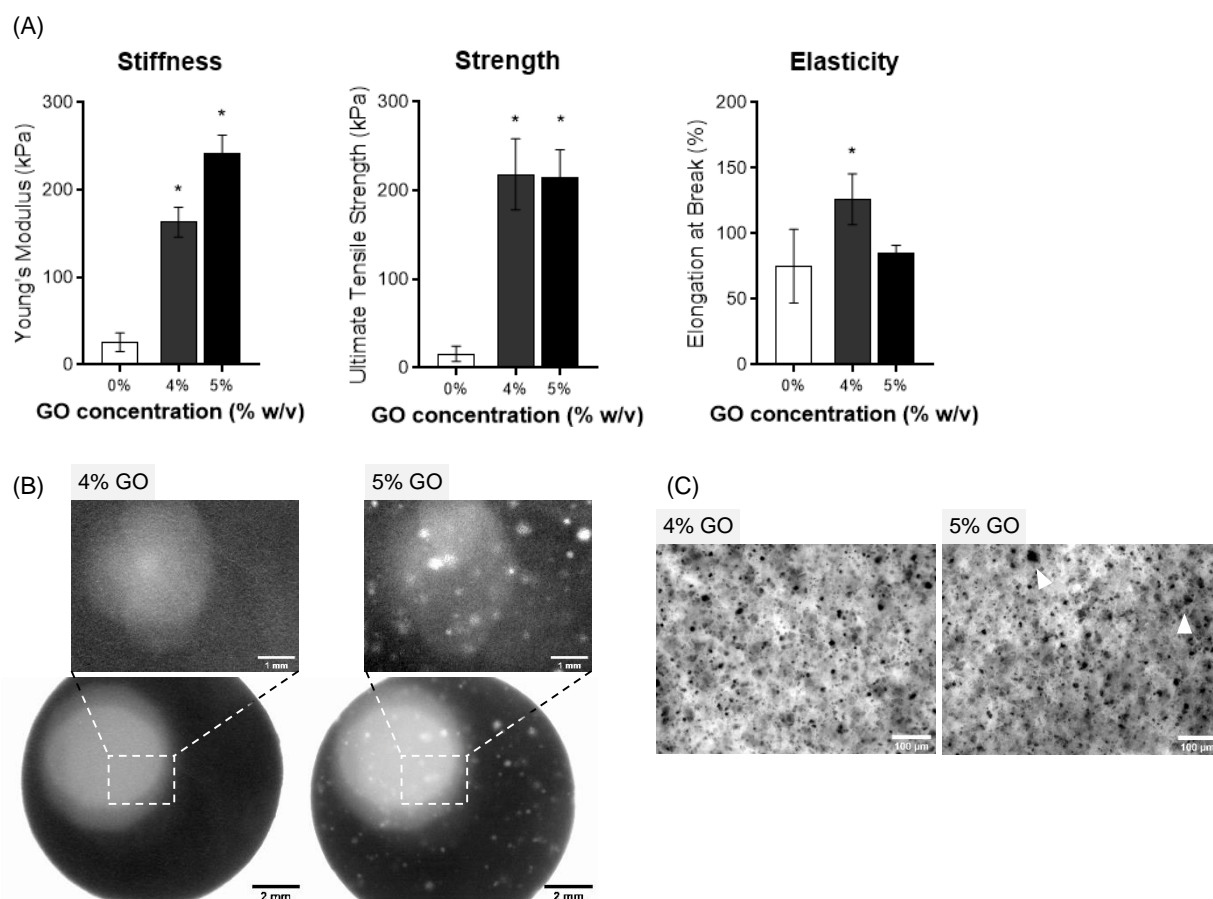

**Figure S1 – Effect of GO concentration in tensile properties, macroscopic appearance and in GO dispersion in matrix of PEG/GO composite hydrogels.** (A) Young's modulus, ultimate tensile strength and elongation at break of neat PEG hydrogels (0% GO), and 4% and 5% GO composite hydrogels. At least 3 technical replicates; Kruskal-Wallis analysis, Dunn's multiple comparison test, \*  $p < 0.05$  vs. neat PEG hydrogels; no statistically significant differences between 4% and 5% GO. (B) Stereomicroscope images of 4% and 5% GO composite hydrogels; scale bar: 2 mm; scale bar in zoomed images: 1 mm. (C) Brightfield images from widefield microscope, showing GO dispersion in hydrogel matrix; arrowheads indicate larger GO aggregates; scale bar: 100  $\mu\text{m}$ .

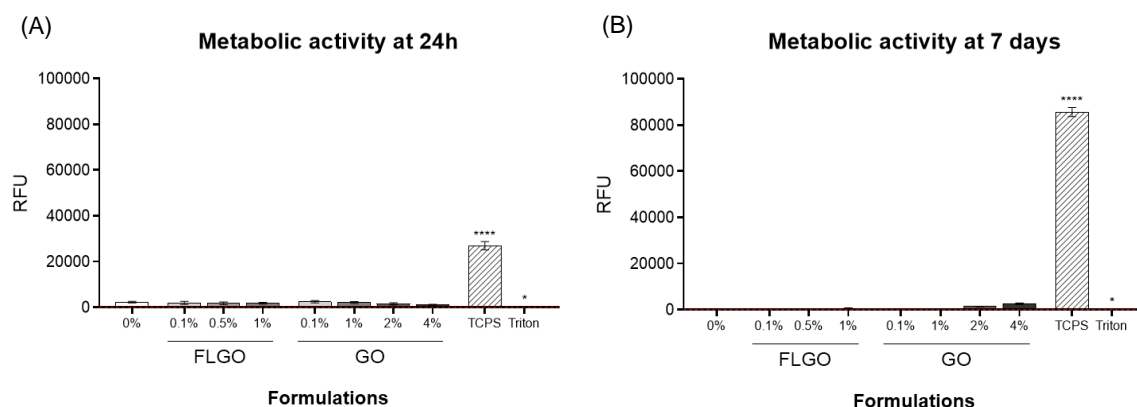

**Figure S2 - Anti-adhesiveness of composite hydrogels.** Metabolic activity, expressed in random fluorescence units (RFU), of HUVEC seeded on top of neat PEG, FLGO and GO composite hydrogels, gelatin-coated TCPS (positive control of cell adhesion) and incubated with 0.1% Triton X-100 (negative control of cell adhesion), after (A) 24h and (B) 7 days of culture.
